# Supplementary material for: Variations in Soil Organic Carbon Fractions and Microbial Community in Rice Fields under an Integrated Cropping System
Source: MDPI journal article supplement (doi:10.3390/agronomy14010081), 2023-12-28
Supplement: s1 [file s1]

**Manuscript title:** Variations in soil organic carbon fractions and microbial community in rice fields under an integrated cropping system

**Author's Name:** Chao Wang<sup>1,2,3</sup>, Qiannan Yang<sup>1,2</sup>, Jing Chen<sup>1,2</sup>, Chi Zhang<sup>3</sup>, Kexue Liu<sup>1,2\*</sup>

**Affiliations:**

<sup>1</sup> School of Resources and Planning, Guangzhou Xinhua University, Guangzhou, 510520, China.

<sup>2</sup> Institute of South China Urban-Rural Economic and Social Development, Guangzhou 510642, China

<sup>3</sup> College of Natural Resources and Environment, South China Agricultural University, Guangzhou 510642, China

**Corresponding Author:** Kexue Liu Tel: +86 13688859099; Fax: 0202 87579896; Email: liukexue@xhsysu.edu.cn

**Appendix. Supplementary data**

Table S1 Soil nutrient, soil carbon indicators and C-related enzyme activities under different cropping systems.

| Indicator | Unit | RFD | RPS | CRS | RFD | RPS | CRS |
|-----------|------|-----|-----|-----|-----|-----|-----|
|-----------|------|-----|-----|-----|-----|-----|-----|

|       |                     | Topsoil       |              |              | Subsoil      |              |              |
|-------|---------------------|---------------|--------------|--------------|--------------|--------------|--------------|
| pH    |                     | 5.82±0.03a    | 5.67±0.02b   | 5.00±0.08c   | 5.83±0.05a   | 5.87±0.07a   | 4.98±0.06b   |
| TN    | g kg <sup>-1</sup>  | 1.15±0.02a    | 0.85±0.02b   | 0.82±0.06b   | 1.08±0.06a   | 0.66±0.03b   | 0.76±0.07b   |
| TP    | g kg <sup>-1</sup>  | 2.31±0.06a    | 1.36±0.05b   | 1.23±0.02c   | 1.92±0.02a   | 1.24±0.02b   | 1.06±0.01c   |
| TK    | g kg <sup>-1</sup>  | 15.89±0.94a   | 7.76±0.27b   | 15.07±0.07a  | 13.38±0.38b  | 7.04±0.26c   | 14.51±0.39a  |
| AN    | mg kg <sup>-1</sup> | 86.27±1.44a   | 56.06±0.83b  | 48.96±0.83c  | 82.99±1.44a  | 47.14±0.83b  | 47.87±0.32b  |
| AP    | mg kg <sup>-1</sup> | 203.58±1.17a  | 54.45±1.12c  | 68.45±0.92b  | 196.40±3.48a | 42.76±0.56c  | 68.45±1.28b  |
| AK    | mg kg <sup>-1</sup> | 186.67±2.89a  | 131.67±2.89b | 88.00±3.46c  | 88.33±5.77b  | 116.67±4.16a | 76.67±2.89c  |
| OC    | g kg <sup>-1</sup>  | 10.99±0.16a   | 9.06±0.15b   | 7.94±0.06c   | 10.11±0.24a  | 7.64±0.38b   | 7.46±0.15b   |
| EOC   | g kg <sup>-1</sup>  | 1.45±0.08a    | 0.70±0.07c   | 1.18±0.01b   | 1.32±0.08a   | 0.24±0.03c   | 0.47±0.03b   |
| DOC   | mg kg <sup>-1</sup> | 304.78±5.49a  | 271.57±7.45b | 228.72±5.58c | 278.77±4.31a | 262.84±6.07b | 179.60±1.57c |
| MBC   | mg kg <sup>-1</sup> | 154.84±10.98a | 98.09±1.81b  | 48.90±1.31c  | 67.85±5.73a  | 37.99±1.97b  | 44.74±3.40b  |
| HA    | g kg <sup>-1</sup>  | 0.93±0.05a    | 0.41±0.03c   | 0.59±0.03b   | 0.83±0.09a   | 0.39±0.02b   | 0.45±0.02b   |
| FA    | g kg <sup>-1</sup>  | 2.75±0.05a    | 2.29±0.11b   | 1.65±0.07c   | 2.56±0.08a   | 2.08±0.11b   | 1.65±0.04c   |
| HA/FA |                     | 0.34±0.02a    | 0.18±0.01b   | 0.36±0.01a   | 0.32±0.04a   | 0.19±0.02b   | 0.27±0.02a   |

RFD, rice–fish–duck integrated cropping system; RPS, rice–pepper rotation system; CRS, conventional rice cropping system. TN, total nitrogen; TP, total phosphorus; TK, total potassium; AN, available nitrogen; AP, available phosphorus; AK, available potassium; OC, organic carbon; EOC, easily oxidized organic carbon; DOC, dissolved organic carbon; MBC, microbial biomass carbon; HA, humic acid; FA, fulvic acid; HA/FA, ratio of HA to FA. Different letters indicate significant differences between cropping systems at  $P < 0.05$  level.

Table S2 Nutrient content of duck manure

|             | Weight<br>(kg d <sup>-1</sup> ) | SOM<br>(g kg <sup>-1</sup> ) | TN<br>(g kg <sup>-1</sup> ) | TP<br>(g kg <sup>-1</sup> ) | TK<br>(g kg <sup>-1</sup> ) |
|-------------|---------------------------------|------------------------------|-----------------------------|-----------------------------|-----------------------------|
| Duck manure | 0.14                            | 262                          | 11.0                        | 14.0                        | 6.2                         |

SOM, soil organic matter; TN, total nitrogen; TP, total phosphorus; TK, total potassium

Table S3 Sensitivity index of soil chemical properties and soil carbon fractions to copping systems

|          | TN             | TP   | TK   | AN   | AP   | AK   | MBC                  | OC   | EOC  | DOC  | HA   | FA   |
|----------|----------------|------|------|------|------|------|----------------------|------|------|------|------|------|
| 0–10 cm  | 0.50           | 0.97 | 1.22 | 0.82 | 2.84 | 1.26 | 2.52                 | 0.40 | 1.29 | 0.38 | 1.52 | 0.77 |
| 10–20 cm | 0.81           | 0.86 | 1.18 | 0.82 | 2.70 | 0.60 | 1.06                 | 0.42 | 5.15 | 0.58 | 1.45 | 0.63 |
| Sum      | 1.31           | 1.83 | 2.40 | 1.64 | 5.54 | 1.86 | 3.58                 | 0.83 | 6.44 | 0.96 | 2.97 | 1.40 |
|          | Soil nutrients |      |      |      |      |      | Soil carbon contents |      |      |      |      |      |

|         |      |      |
|---------|------|------|
| Average | 2.43 | 2.70 |
|---------|------|------|

The soil sensitivity index (*SI*) is derived from the following equation (Bremer et al., 1994):  $SI = (I_{\max} - I_{\min})/I_{\min}$ , where  $I_{\max}$  is the maximum value of variables under different cropping systems,  $I_{\min}$  is the minimum value of variables under different cropping systems.

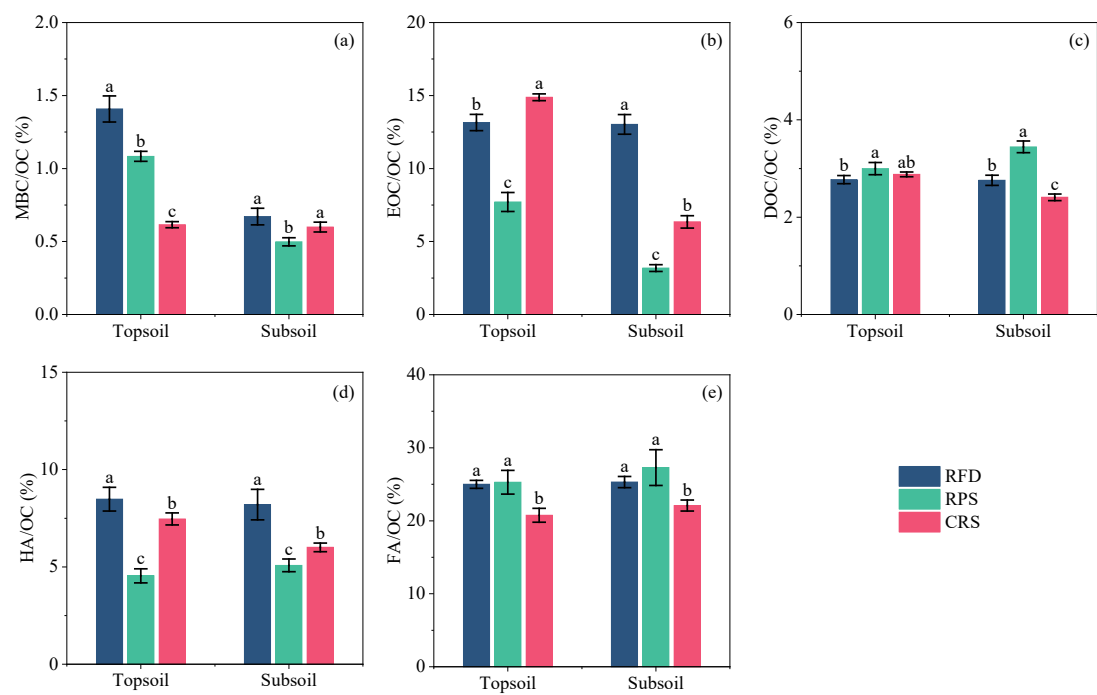

Figure S1. Proportion of soil microbial biomass carbon (MBC, a), easily-oxidation organic carbon (EOC, b), dissolved organic carbon (DOC, c), humic acid (HA, d), and fluvic acid (FA, e) under cropping systems. RFD, rice–fish–duck integrated cropping system; RPS, rice–pepper rotation system; CRS, conventional rice cropping system. Different letters indicate significant differences between cropping systems at  $P < 0.05$  level.

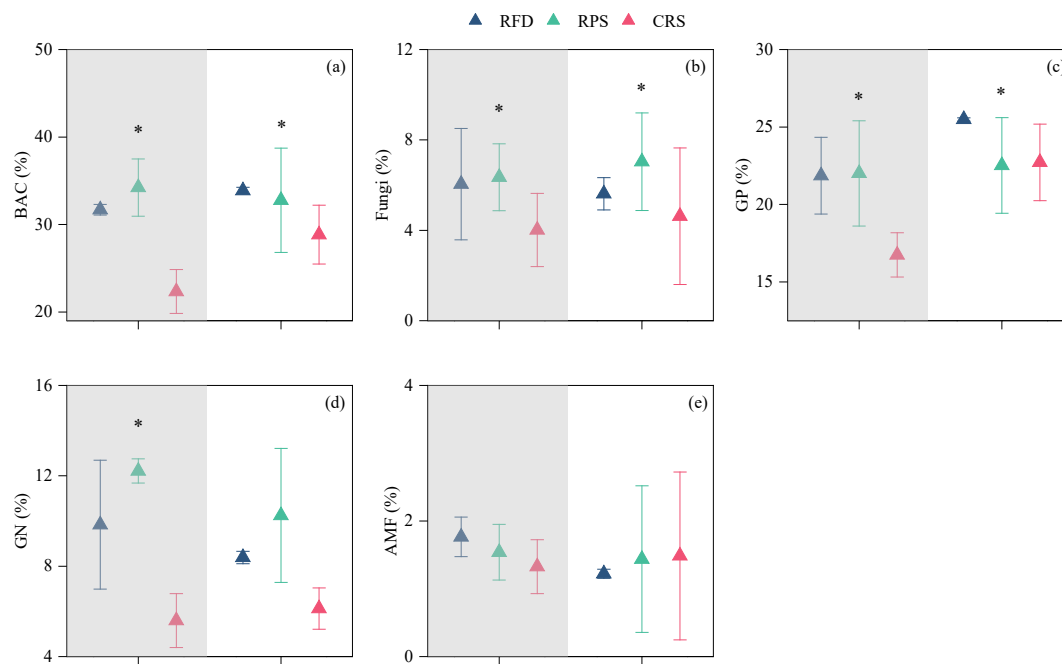

Figure S2. Relative abundances of bacteria (a), fungi (b), gram-positive bacteria (c), gram-negative bacteria (d), and arbuscular mycorrhizal fungi (e), and fungi: bacteria (i) under different cropping systems.

BAC, bacteria; GP, gram-positive bacteria; GN, gram-negative bacteria; arbuscular mycorrhizal fungi. RFD, rice–fish–duck integrated cropping system; RPS, rice–pepper rotation system; CRS, conventional rice cropping system. “\*” means significant difference at  $P < 0.05$  among different cropping systems.

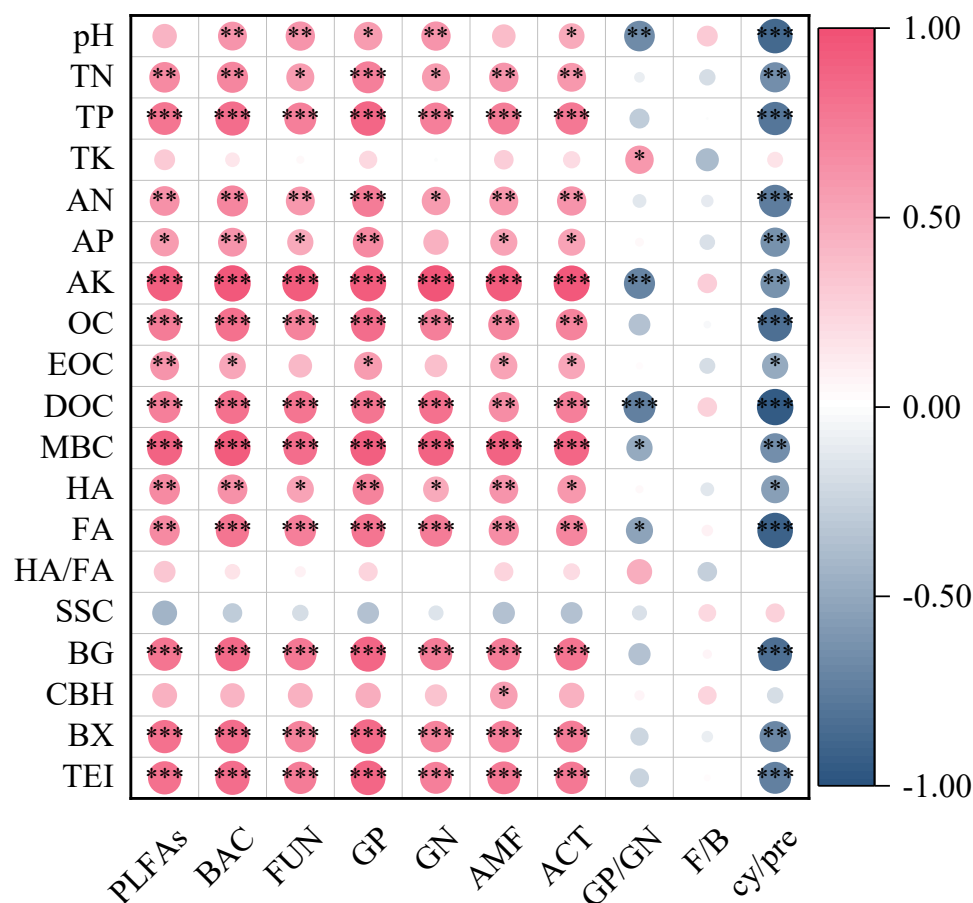

Figure S3. Relationship between soil nutrient, organic carbon fractions, C-hydrolyzing enzyme activities, and each individual PLFAs. TN, total nitrogen; TP, total phosphorus; TK, total potassium; AN, available nitrogen; AP, available phosphorus; AK, available potassium; OC, organic carbon; EOC, easily oxidized organic carbon; DOC, dissolved organic carbon; MBC, microbial biomass carbon; HA, humic acid; FA, fulvic acid; HA/FA, ratio of HA to FA; BG,  $\beta$ -1,4-glucosidase; CBH,  $\beta$ -Dcellobiohydrolase; BX, Xylosidase; TEI, total enzyme activity index. BAC, bacteria; FUN, fungi; GP, gram-positive bacteria; GN, gram-negative bacteria; AMF, arbuscular mycorrhizal fungi; GP/GN, gram-positive bacteria to gram-negative bacteria; F/B, the ratio of fungi to bacteria; cy/pre: the ratio of cyclopropyl to precursors PLFAs. \*,  $P < 0.05$ ; \*\*,  $P < 0.01$ ; \*\*\*,  $P < 0.001$ .
